# Supplementary material for: Green and facile synthesis of silicon-doped carbon dots and their use in detection of Hg2+ and visualization of latent fingerprints
Source: Royal Society of Chemistry journal article supplement (doi:10.1039/d2nj04671g), 2022-11-17
Supplement: d2nj04671g1.pdf [file d2nj04671g1.pdf]

## *Electronic Supplementary Information*

### **Green and facile synthesis of silicon doped carbon dots with their use in detection for Hg<sup>2+</sup> and visualization of latent fingerprints**

Tingting Li,<sup>a</sup> Yuxue Ning,<sup>a</sup> Jingyu Pang,<sup>a</sup> Lihua Chen,<sup>\*b</sup> Fang Zhang,<sup>\*c</sup> Fang Chai<sup>\*a</sup>

<sup>a</sup> Key Laboratory of Photochemical Biomaterials and Energy Storage Materials, Heilongjiang Province; Key Laboratory for Photonic and Electronic Bandgap Materials, Ministry of Education, College of Chemistry and Chemical Engineering, Harbin Normal University, Harbin, 150025, Heilongjiang Province, China.

<sup>b</sup> Shandong Key Laboratory of Biochemical Analysis, College of Chemistry and Molecular Engineering, Qingdao University of Science and Technology, Qingdao 266042, P. R. China.

<sup>c</sup> Beibu Gulf Institute of Marine Advanced Materials, Beihai 536015, China.

\* Corresponding author:

Lihuachen@qust.edu.cn; zhang\_fang2121@sina.com; fangchai@gmail.com

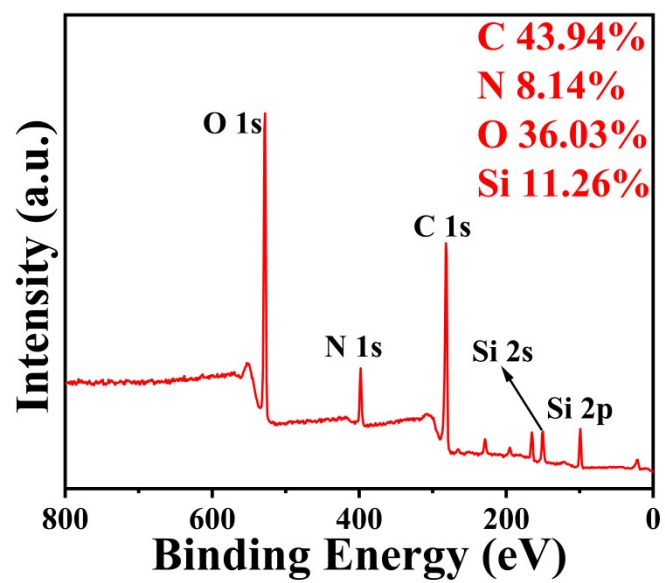

**Fig. S1** Full survey XPS spectra of the Si-CDs.

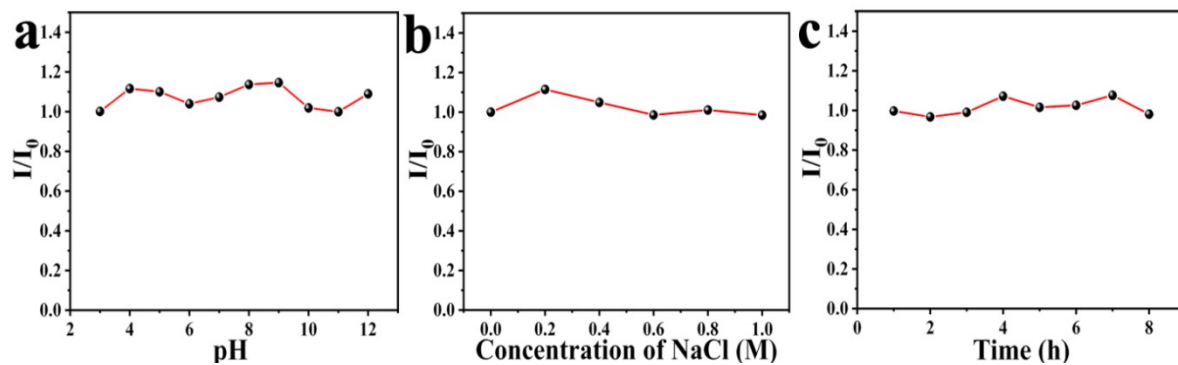

**Fig. S2** Fluorescence intensity ratio  $I/I_0$  of the Si-CDs under (a) different pH, (b) different salinity conditions, (c) different storage times.

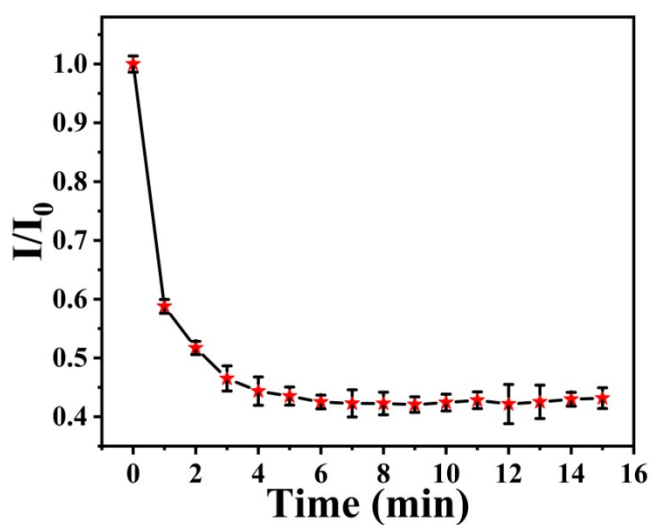

**Fig. S3** Fluorescence intensity ratio ( $I/I_0$ ) of Si-CDs at different incubating time from 0-15 min in the presence of  $Hg^{2+}$  ( $100 \mu M$ ).

**Table S1** Comparison of different sensors for Hg<sup>2+</sup> detection.

| <b>Material</b>       | <b>Linear range (<math>\mu\text{M}</math>)</b> | <b>LOD (nM)</b> | <b>Reference</b> |
|-----------------------|------------------------------------------------|-----------------|------------------|
| Ag-S-gCN QDs          | 0.1-0.6                                        | 13              | 58               |
| N, S-CDs              | 1.0-75.0                                       | 500             | 59               |
| N-CQDs                | 0-18                                           | 83.5            | 60               |
| La-CQDs               | 0.5 -40                                        | 100             | 61               |
| Bis-hydrazone         | 0-5                                            | 102.5           | 62               |
| Pyrazoline derivative | 20-200                                         | 14540           | 63               |
| Silicon nanocrystals  | 0.05-1                                         | 50              | 64               |
| Si-CDs                | 0.008-0.4                                      | 33              | This work        |
